# Supplementary material for: Exon- and contraction-dependent functions of titin in sarcomere assembly
Source: Oxford University Press journal article supplement (doi:10.1242/dev.139246), 2016-11-12
Supplement: dev139246supp.pdf [file dev139246supp.pdf]

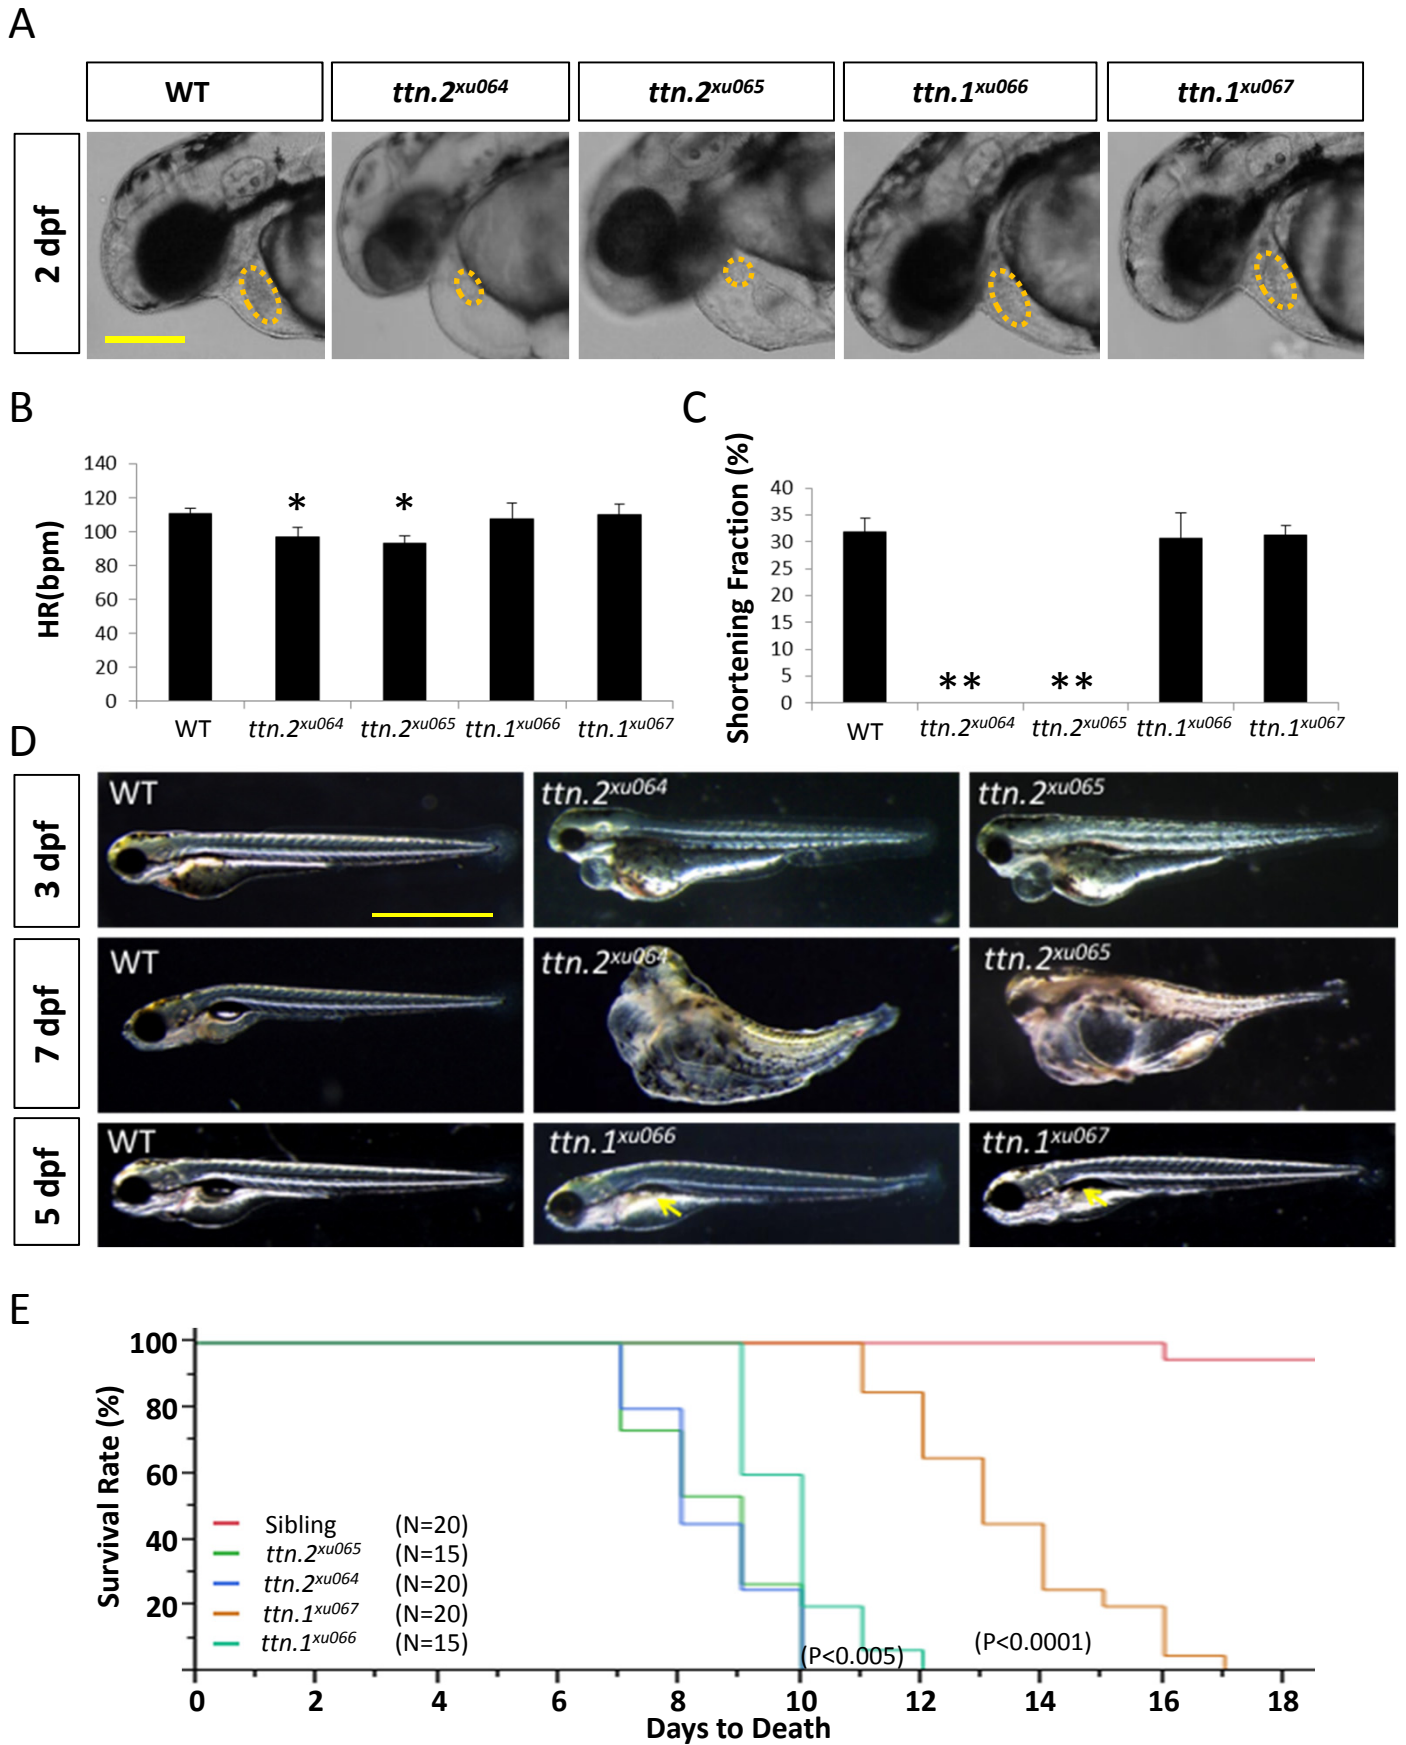

Figure S1.

**Figure S1.** Phenotypes of *ttn.2* and *ttn.1* mutants. A, Cardiac edema with decreased ventricle size (dashed circles) was noted in both *ttn.2<sup>xu064</sup>* and *ttn.2<sup>xu065</sup>*, but not in *ttn.1<sup>xu066</sup>* and *ttn.1<sup>xu067</sup>*. Shown are bright-field images at 2 dpf. Scale bar, 0.05 mm. B and C, In *ttn.2<sup>xu064</sup>* and *ttn.2<sup>xu065</sup>*, the heart rate was slightly decreased (B), and the ventricular shortening fraction was reduced to zero (C). \* and \*\* indicates  $p < 0.05$  and  $p < 0.01$ , respectively. Means  $\pm$  S.D. N=5. D, Bright-field images demonstrated that the cardiac edema was still present in both *ttn.2<sup>xu064</sup>* and *ttn.2<sup>xu065</sup>* at 3 dpf, but muscle disarray was more obvious in *ttn.2<sup>xu065</sup>*. Both *ttn.2* mutants had whole-body edema at 7 dpf. *ttn.1<sup>xu066</sup>* and *ttn.1<sup>xu067</sup>* showed deflation of the swim bladder at 5 dpf (arrows). Scale bar, 1 mm. E, *ttn.2<sup>xu064</sup>* and *ttn.2<sup>xu065</sup>* mutants started to die at 7 dpf and could survive up to 10 dpf; *ttn.1<sup>xu066</sup>* could survive until 12 dpf; and *ttn.1<sup>xu067</sup>* started to die at 11 dpf and could live up to 17 dpf.

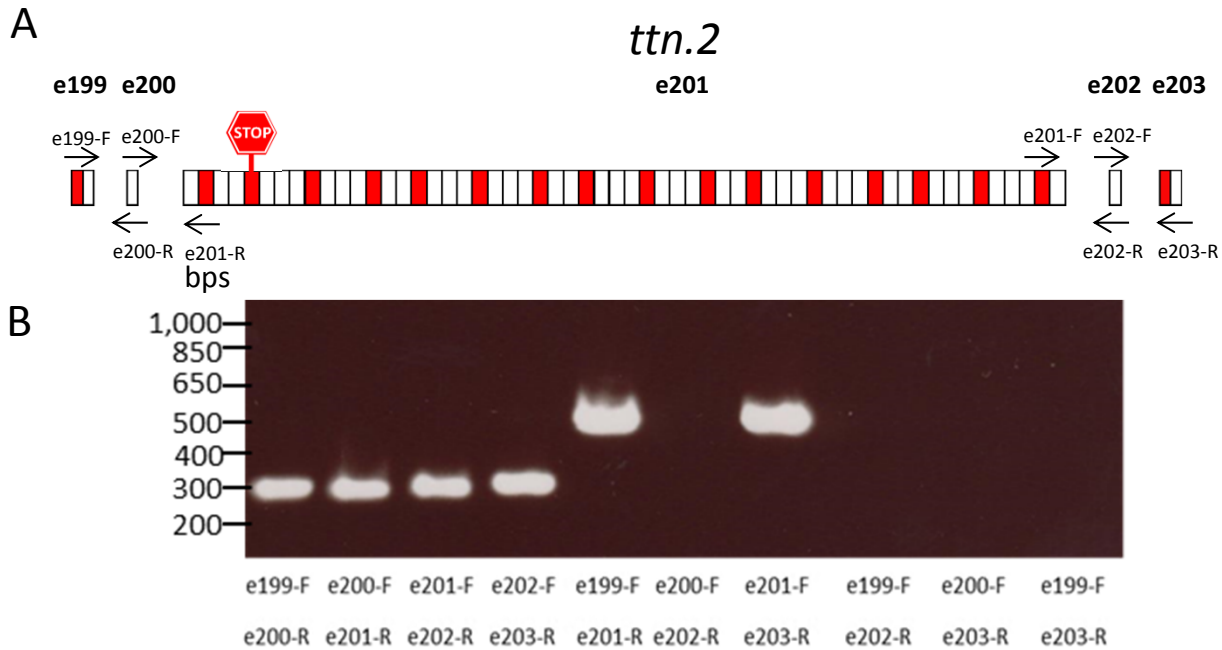

**Figure S2.** No Exon Skipping of Exon 201 of *ttn.2*. A, RT-PCR using different combinations of forward and reverse primers targeted to exons around 199-203 of *ttn.2*. B, RT-PCR using different combinations of primers showed no exon-skipping event.

A

| <i>ttn.2</i> |       | <i>ttn.1</i> |       |
|--------------|-------|--------------|-------|
| e4/e5        | 98.9% | e4/e5        | 91.8% |
| e200/e201    | 93.4% | e164/e165    | 94.9% |
| N2B          | 98.1% | N2B          | 98%   |
| N2A          | 98.1% | N2A          | 98.8% |
| M            | 91.7% | M            | 95.2% |

B

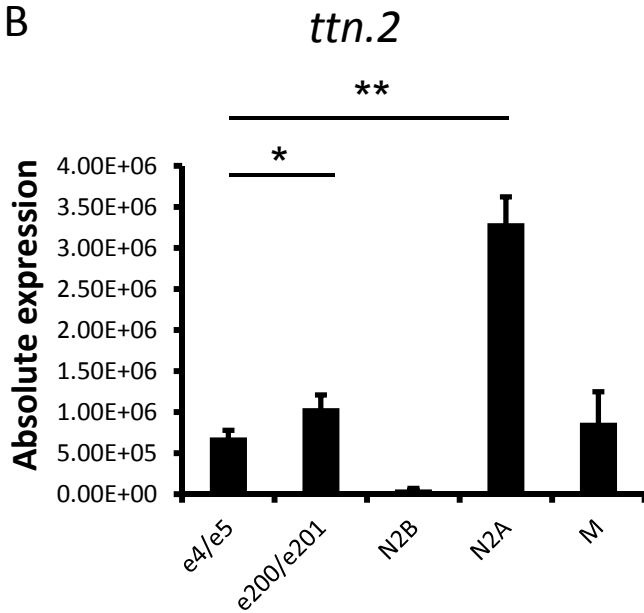

C

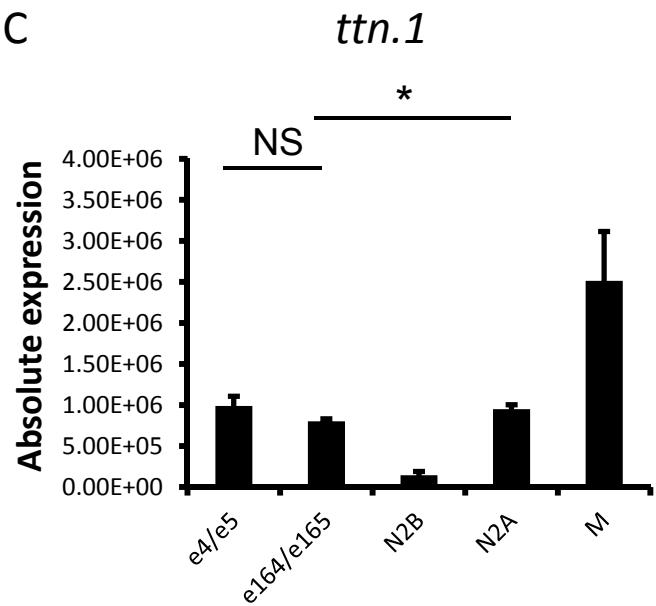

D

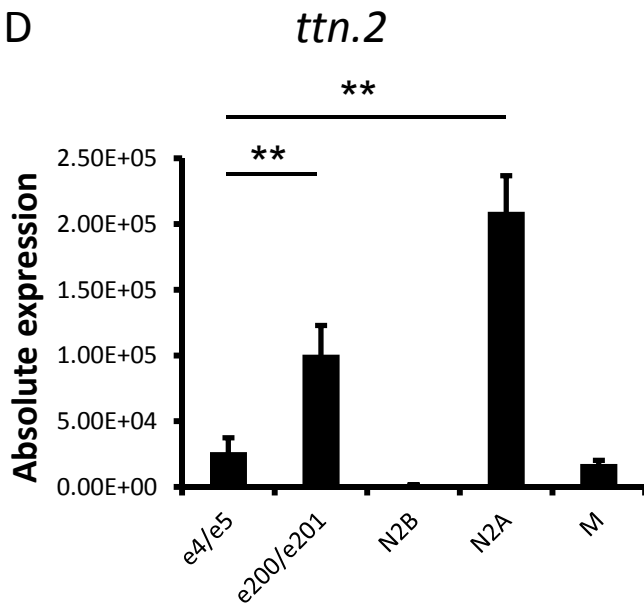

E

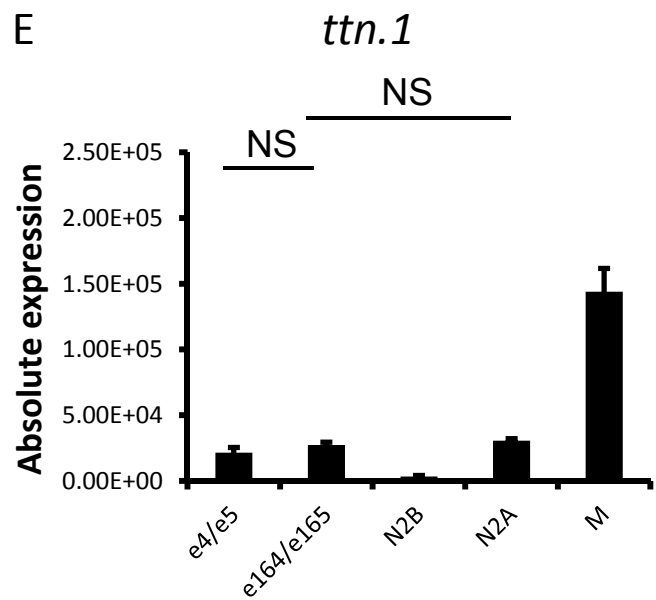

Figure S3.

**Figure S3.** Usage of Different Exons in *ttn.2* and *ttn.1* in 5 dpf and 9 dpf WT embryos. A, Efficiency of the primers in *ttn.2* and *ttn.1* was obtained by qPCR using standard curve. B and C, Exon usage was quantified using absolute qPCR with primers targeting exons in *ttn.2* (B) and *ttn.1* (C) in 5 dpf WT embryos. Means  $\pm$ S.D. N=9. D and E, Usage of exons of *ttn.2* (D) and *ttn.1* (E) in 9 dpf WT embryos. Means  $\pm$ S.D. N=9. \* indicates  $p < 0.05$ , \*\* indicates  $p < 0.01$ , NS indicates not statistically significant ( $p > 0.05$ ).

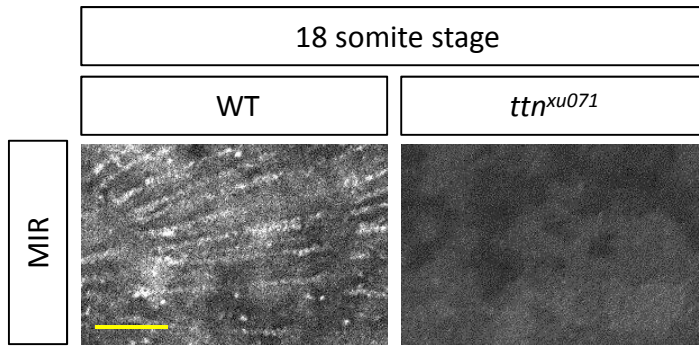

**Figure S4.** The Assembly of Titin Into Premyofibrils. Titin isoforms were assembled into premyofibrils and became striated at the 12th somite of an 18-somite embryo, as indicated by immunostaining using MIR, an anti-Titin antibody. Loss of Titin in somites in the *ttn<sup>xu071</sup>* mutant has been seen. Scale bar, 20  $\mu\text{m}$ .

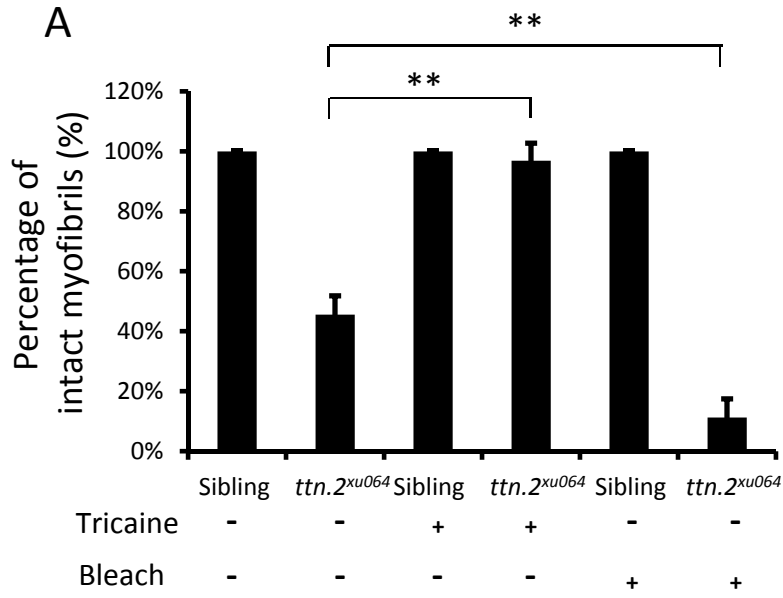

**Figure S5.** Inhibiting or inducing muscle contraction exert opposite effects on myofibril damage in the slow muscle of *ttn.2<sup>xu064</sup>*. Shown are percentage of intact myofibrils out of total myofibrils at the 8th to 12th somites of larvae. Representative images are shown in Fig. 8C. Means  $\pm$  S.D. N=5. \*\* indicates  $p < 0.01$ . Tricaine treatment significantly prevented the breakage of myofibrils in *ttn.2<sup>xu064</sup>*. Conversely, bleach treatment significantly increased the breakage of myofibrils in *ttn.2<sup>xu064</sup>*. Siblings include both WT and heterozygotes.

| Mutants               | <i>ttn.1<sup>xu067</sup></i>                                                      | <i>ttn.1<sup>xu066</sup></i>                                                      | <i>ttn.2<sup>xu064</sup></i>                                                      | <i>ttn.2<sup>xu065</sup></i>                                                      | <i>ttn<sup>xu069</sup></i>                                                          | <i>ttn<sup>xu070</sup></i>                                                          | <i>ttn<sup>xu071</sup></i>                                                          |
|-----------------------|-----------------------------------------------------------------------------------|-----------------------------------------------------------------------------------|-----------------------------------------------------------------------------------|-----------------------------------------------------------------------------------|-------------------------------------------------------------------------------------|-------------------------------------------------------------------------------------|-------------------------------------------------------------------------------------|
| Ttn Expression        |  |  |  |  |  |  |  |
| Phenotypes in somites | N.A.                                                                              | 9 dpf                                                                             | 2 dpf (S)                                                                         | 18S (m)                                                                           | 18S                                                                                 | 18S                                                                                 | 18S                                                                                 |
|                       | Sarcomere stability                                                               |                                                                                   |                                                                                   | <i>de novo</i> Sarcomere assembly                                                 |                                                                                     |                                                                                     |                                                                                     |

**Figure S6.** Summary of Ttn protein expression and sarcomeric phenotypes in 7 *ttn* mutants. (S) indicates slow muscle-specific phenotypes; 18S, 18-somite stage; N.A., not available; (m), mild phenotypes, as represented by occasional striated structures (See inset in Fig. 2A).

**Table S1.** Nomenclature of *ttn* mutants

[Click here to Download Table S1](#)



**Table S2.** Primers list for genotyping (A) and polymerase chain reaction (B).**A.**

| allele                                                         | Forward Primer        | Reverse Primer       | Restriction Enzyme | Size of PCR product | Size of PCR product after digestion |
|----------------------------------------------------------------|-----------------------|----------------------|--------------------|---------------------|-------------------------------------|
| <i>xu64</i> ,<br><i>xu68</i> ,<br><i>xu69</i>                  | TGCATTTTCATTGGTTCACAG | CCTCACAGGAGAGGGAGACT | EcoRV              | 406                 | 81, 325                             |
| <i>xu65</i> ,<br><i>xu68</i> ,<br><i>xu70</i> ,<br><i>xu71</i> | ACAAACTGGCAGAAATGCTC  | GTCGACTTTCTCGAGTTCA  | HindIII            | 403                 | 304, 99                             |
| <i>xu66</i> ,<br><i>xu69</i> ,<br><i>xu71</i>                  | TGGTTTCACCCAAATTTAC   | CTTTAACAGGCCTCACAGGA | CaC8I              | 453                 | 120, 333                            |
| <i>xu67</i> ,<br><i>xu70</i>                                   | TGGGAAATGCCTCTTATTGA  | GATGACTTCGCCAGAATA   | BglII              | 480                 | 131, 349                            |

**B.**

|              | Primer               | Note |              | Primer               | Note |
|--------------|----------------------|------|--------------|----------------------|------|
| ttn.2-e4-F   | CCGCTGACTTTCAGATTGTT | †    | ttn.1-M-R    | GGACTGCACTTCTCATAGGT | § †  |
| ttn.2-e5-R   | CGAGTCTGACGAGTTTGTGA | †    | gapdh-F      | CCACCCATGGAAAGTACAAG | § #  |
| ttn.2-e200-F | GTTTTGGTGAACCCAGTGAG | † ^  | gapdh-R      | CTCTCTTTCACCACCCTTA  | § #  |
| ttn.2-e201-R | AAGCGCACTGACTCTGAAGT | † ^  | ttn.2-e2-F   | CAGGCACCAACATTTACACA | %    |
| ttn.2-N2B-F  | CACAAACCGTTGTACTTTCA | †    | ttn.2-e7-R   | GGAGGTCTGGACTTGTGTTG | %    |
| ttn.2-N2B-R  | TTCTCTTAGGGTTGCACTG  | †    | ttn.1-e2-F   | AACATTTACACAGCCGCTTC | %    |
| ttn.2-N2A-F  | TGCAGCACTGACTTGAATGT | †    | ttn.1-e7-R   | AACATAACCCTCTGCTTCC  | %    |
| ttn.2-N2A-R  | TCGATAGCTTGAAGGAGACC | †    | ttn.2-e199-F | GTCTGGACCAGTCAAATGG  | ^    |
| ttn.2-M-F    | CTCTTTTGTGGGCAAGTGT  | § †  | ttn.2-e200-R | CTCACTGGGTTCAACAAAAC | ^    |
| ttn.2-M-R    | AATGATGCCTCTTGCATTGT | § †  | ttn.2-e201-F | GTGGTGCTCCAGTCAAAAAC | ^    |
| ttn.1-e4-F   | CCGCTGACTTTCAGATTGTT | †    | ttn.2-e202-R | CTTCCTCCATCATGTTCTGG | ^    |
| ttn.1-e5-R   | CCTGGCGAGTCTGTGAAAT  | †    | ttn.2-e202-F | CCAGAACATGATGGAGGAAG | ^    |
| ttn.1-       | GTGAACCCTCAATTCCTGTG | † *  | ttn.2-       | CCAGTAAGGGGGATCTCAAT | ^    |

|              |                       |     |              |                       |   |
|--------------|-----------------------|-----|--------------|-----------------------|---|
| e164-F       |                       |     | e203-R       |                       |   |
| ttn.1-e165-R | ACTTCAGTCCAGCTTCCAAA  | † * | ttn.1-e163-F | CTGGTGATGCCTCTCACTCT  | * |
| ttn.1-N2B-F  | GCTACAGTGTACCCGAAGGA  | †   | ttn.1-e164-R | ATGCTCGTGTCCATCTCATT  | * |
| ttn.1-N2B-R  | TGCATTTCAAAGATTTCTCTT | †   | ttn.1-e165-F | AGGCCTGGGTATGTGTATCA  | * |
| ttn.1-N2A-F  | TTGCTAAAGTCGGTGGTGAT  | †   | ttn.1-e166-R | TCCACCATCAAACCTCTGGTT | * |
| ttn.1-N2A-R  | GGCCAGACTCTTTCTTCTC   | †   | ttn.1-e166-F | GACTCAGTGAGCCCAAAGAA  | * |
| ttn.1-M-F    | CATGGTTCAGCACATCTTGA  | § † | ttn.1-e167-R | CTAAATCGCTTGCCACACTT  | * |

§: Primers used in Fig. 1D-E and 4D and 5C

†: Primers used in Fig. 3A-B and Fig. S3

‡: Primers used in Fig. 3C

^: Primers used in Fig. S2

\*: Primers used in Fig. 3E-F
